# Supplementary material for: Single molecule kinetics of horseradish peroxidase exposed in large arrays of femtoliter-sized fused silica chambers
Source: Royal Society of Chemistry journal article supplement (doi:10.1039/c3an00809f), 2013-01-01
Supplement: c3an00809f.pdf [file c3an00809f.pdf]

## Electronic Supplementary Information

### Single molecule kinetics of horseradish peroxidase exposed in large arrays of femtoliter-sized fused silica chambers

Benno N. Ehrl, Raphaela B. Liebherr, Hans H. Gorris\*

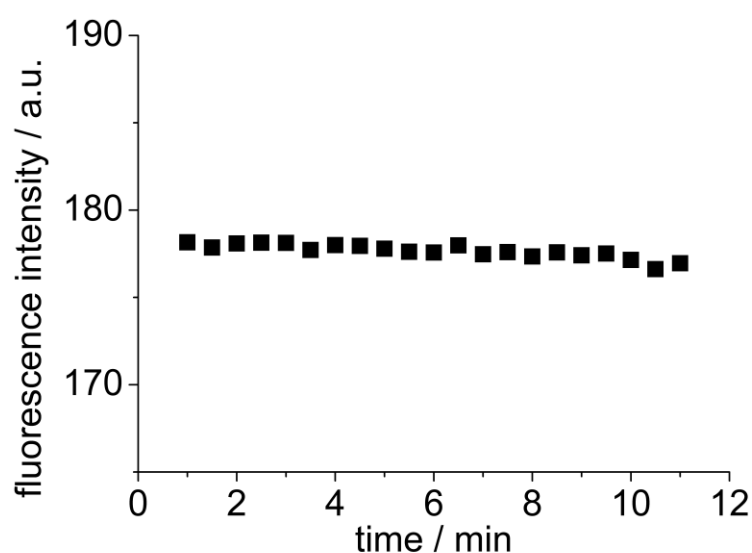

**Supporting Figure 1.** Photobleaching of a 1  $\mu\text{M}$  resorufin solution enclosed in the femtoliter array under low power excitation (neutral density filter (ND) = 32, exposure time of 1 s, images taken every 30 s).

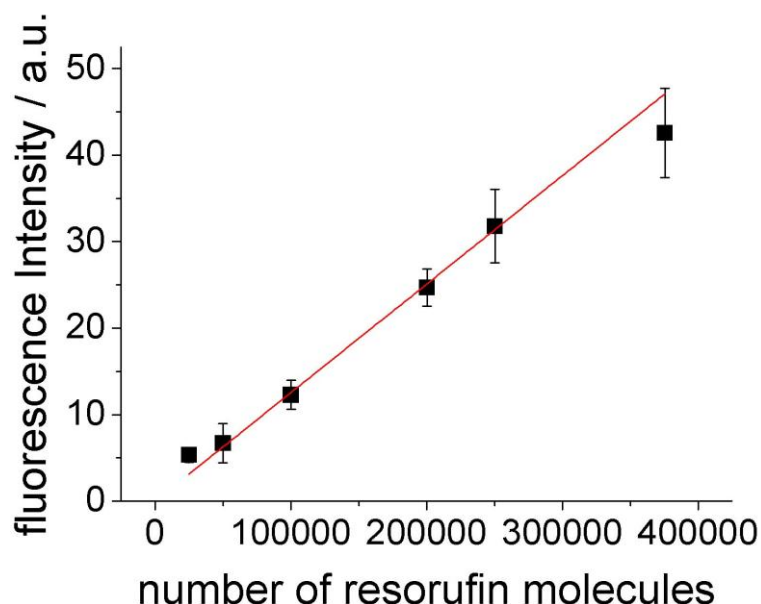

**Supporting Figure 2.** Calibration plot of the fluorescence intensity in femtoliter chambers. Standard solutions (1, 2, 4, 8, 10 and 15  $\mu\text{M}$ ) of resorufin were enclosed in the array. The red line is a linear regression of the data points (three measurements / standard deviation). The number of resorufin molecules in a well was calculated by:  $\text{FI} = 0.00125 \times (\#\text{molecules})$

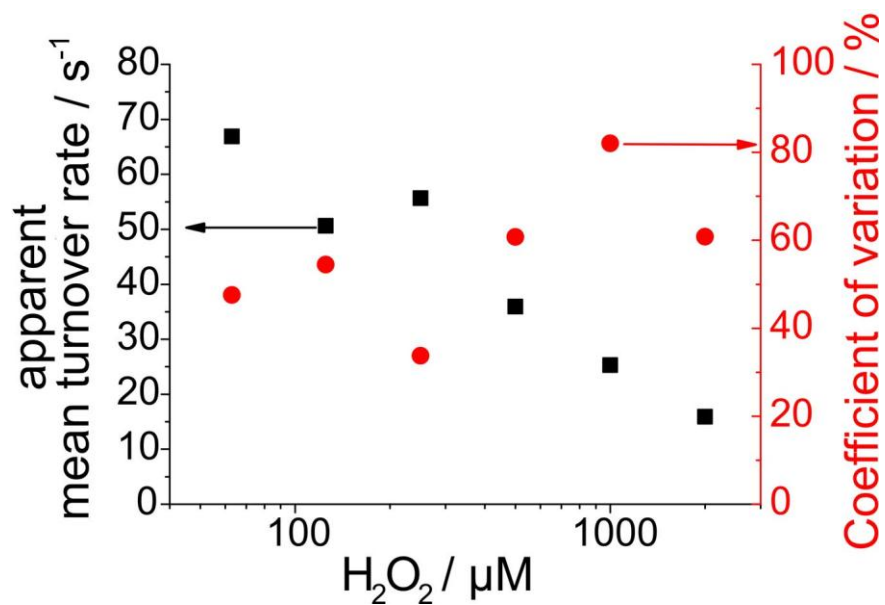

**Supporting Figure 3** Summary of the mean turnover rates (black) and the respective coefficients of variation (red) of the Gaussian distributions shown in Figure 3.

**Supporting Movie 1:** Time-lapse of resorufin formation by individual HRP molecules in the femtoliter array. Sequential fluorescence images were taken with a sCMOS camera every 30 s with low excitation light (ND = 32) and an exposure time of 1 s. Chambers that contain a single molecule of HRP can be clearly identified. Three images of this movie are shown in Figure 2a.
